# Supplementary material for: COVID-19: Azelastine nasal spray Reduces Virus-load In Nasal swabs (CARVIN). Early intervention with azelastine nasal sprays reduces viral load in SARS-CoV-2 infected patients. First report on a double-blind placebo-controlled phase II clinical trial.
Source: Research Square preprint supplement (doi:10.21203/rs.3.rs-864566/v1), 2021-09-16
Supplement: Supplementary file 2 [file bc7087ed261da52f1e4f7500.docx]

Table S 2: Quantitative PCR results (log10 cp/ml) for ORF 1a/b and E gene, during the course of the treatment phase including only patients with Ct values <25 (Modified Intention-To-Treat analysis set)

|  |  | **Azelastine 0.1% (A)** | | **Azelastine 0.02% (B)** | | **Placebo (C)** | | **Total** | |
| --- | --- | --- | --- | --- | --- | --- | --- | --- | --- |
|  |  | **ORF**1a/b | **E** | **ORF**1a/b | **E** | **ORF**1a/b | **E** | **ORF**1a/b | **E** |
| **Day 1** | N | 19 | 19 | 21 | 21 | 17 | 17 | 57 | 57 |
| Missing | 0 | 0 | 0 | 0 | 0 | 0 | 0 | 0 |
| Mean | 7.59 | 7.73 | 7.61 | 7.73 | 7.45 | 7.69 | 7.58 | 7.72 |
| Std | 0.72 | 0.77 | 0.71 | 0.72 | 0.45 | 0.44 | 0.64 | 0.66 |
| Median | 7.91 | 8.07 | 7.70 | 7.75 | 7.61 | 7.79 | 7.67 | 7.79 |
| Min/Max | 6.5/8.5 | 6.6/8.8 | 6.4/8.7 | 6.5/8.9 | 6.8/8.4 | 6.9/8.5 | 6.4/8.7 | 6.5/8.9 |
| Q1/Q3 | 6.8/8.3 | 6.9/8.4 | 7/8.1 | 7/8.3 | 7.2/7.8 | 7.3/8 | 7/8.1 | 7.1/8.3 |
| **Day 2** | N | 19 | 19 | 21 | 21 | 17 | 17 | 57 | 57 |
| Missing | 0 | 0 | 0 | 0 | 0 | 0 | 0 | 0 |
| Mean | 6.92 | 7.02 | 7.02 | 7.14 | 7.32 | 7.42 | 7.08 | 7.18 |
| Std | 1.05 | 1.08 | 1.26 | 1.33 | 0.70 | 0.71 | 1.04 | 1.08 |
| Median | 7.25 | 7.24 | 7.27 | 7.52 | 7.45 | 7.48 | 7.37 | 7.49 |
| Min/Max | 4.9/8.7 | 4.9/8.8 | 4.5/9.0 | 4.5/9.1 | 5.7/8.4 | 6.0/8.7 | 4.5/9.0 | 4.5/9.1 |
| Q1/Q3 | 6/7.7 | 6.1/7.9 | 6.7/7.9 | 6.9/8 | 7/7.7 | 7.1/7.8 | 6.7/7.7 | 6.7/7.9 |
| **Day 3** | N | 19 | 19 | 21 | 21 | 17 | 17 | 57 | 57 |
| Missing | 0 | 0 | 0 | 0 | 0 | 0 | 0 | 0 |
| Mean | 6.54 | 6.66 | 6.84 | 6.95 | 6.97 | 7.09 | 6.78 | 6.89 |
| Std | 1 | 1.03 | 0.99 | 1.04 | 0.76 | 0.80 | 0.93 | 0.97 |
| Median | 6.73 | 6.82 | 7.10 | 7.15 | 6.84 | 6.98 | 6.84 | 7 |
| Min/Max | 4.8/8.1 | 4.8/8.3 | 4.8/8.3 | 4.7/8.4 | 5.7/8.2 | 5.7/8.4 | 4.8/8.3 | 4.7/8.4 |
| Q1/Q3 | 5.6/7.3 | 5.7/7.5 | 6.2/7.6 | 6.3/7.8 | 6.4/7.6 | 6.4/7.7 | 6.2/7.5 | 6.3/7.7 |
| **Day 4** | N | 19 | 19 | 21 | 21 | 17 | 17 | 57 | 57 |
| Missing | 0 | 0 | 0 | 0 | 0 | 0 | 0 | 0 |
| Mean | 5.69 | 5.34 | 6.49 | 6.59 | 6.49 | 6.56 | 6.22 | 6.16 |
| Std | 1.26 | 2.20 | 1.32 | 1.39 | 0.82 | 0.87 | 1.21 | 1.67 |
| Median | 5.85 | 5.81 | 6.72 | 6.77 | 6.59 | 6.58 | 6.21 | 6.28 |
| Min/Max | 3.4/7.9 | 0/8.2 | 4.7/8.9 | 4.5/9.1 | 5.2/7.9 | 5.1/8.0 | 3.4/8.9 | 0/9.1 |
| Q1/Q3 | 4.7/6.7 | 4.6/6.8 | 5.2/7.3 | 5.2/7.6 | 5.7/7.2 | 5.8/7.3 | 5.5/7.1 | 5.3/7.3 |
| **Day 5** | N | 19 | 19 | 21 | 21 | 17 | 17 | 57 | 57 |
| Missing | 0 | 0 | 0 | 0 | 0 | 0 | 0 | 0 |
| Mean | 5.21 | 5.21 | 5.76 | 5.34 | 5.94 | 6.01 | 5.63 | 5.49 |
| Std | 1.55 | 1.65 | 1.29 | 2.21 | 0.84 | 0.94 | 1.29 | 1.73 |
| Median | 5.78 | 5.85 | 5.55 | 5.52 | 5.80 | 5.89 | 5.78 | 5.85 |
| Min/Max | 0/7.1 | 0/7.1 | 3.7/8.2 | 0/8.3 | 4.3/7.5 | 4.1/7.7 | 0/8.2 | 0/8.3 |
| Q1/Q3 | 4.9/6.2 | 4.9/6.3 | 4.6/6.9 | 4.2/7 | 5.4/6.7 | 5.5/6.8 | 5/6.5 | 4.9/6.7 |
| **Day 8** | N | 19 | 19 | 21 | 21 | 17 | 17 | 57 | 57 |
| Missing | 0 | 0 | 0 | 0 | 0 | 0 | 0 | 0 |
| Mean | 3.61 | 3.50 | 3.50 | 3.08 | 4.46 | 3.68 | 3.82 | 3.40 |
| Std | 1.65 | 1.64 | 2.38 | 2.59 | 0.70 | 1.93 | 1.79 | 2.10 |
| Median | 4.06 | 3.84 | 4.28 | 4 | 4.32 | 4.05 | 4.20 | 4 |
| Min/Max | 0/5.2 | 0/5.1 | 0/6.4 | 0/6.6 | 3.5/5.8 | 0/6.0 | 0/6.4 | 0/6.6 |
| Q1/Q3 | 3.8/4.5 | 3.5/4.6 | 0/5.3 | 0/5.5 | 3.8/5 | ¾.5 | 3.8/4.9 | 3.3/4.9 |
| **Day 11** | N | 19 | 19 | 21 | 21 | 17 | 17 | 57 | 57 |
| Missing | 0 | 0 | 0 | 0 | 0 | 0 | 0 | 0 |
| Mean | 2.56 | 1.22 | 3.22 | 1.67 | 3.38 | 1.50 | 3.05 | 1.47 |
| Std | 2.04 | 1.85 | 1.93 | 2.20 | 1.33 | 1.86 | 1.82 | 1.96 |
| Median | 3.73 | 0 | 3.69 | 0 | 3.74 | 0.0 | 3.73 | 0 |
| Min/Max | 0/4.8 | 0/4.4 | 0/5.7 | 0/5.3 | 0/4.7 | 0/4.4 | 0/5.7 | 0/5.3 |
| Q1/Q3 | 0/4.1 | 0.3.7 | 3.3/4.4 | 0/4 | 3.4/3.9 | 0/3.4 | 3.3/4.1 | 0/3.7 |
